# Supplementary material for: Evaluation of Candidate Reference Genes for Normalization of Quantitative RT-PCR in Soybean Tissues under Various Abiotic Stress Conditions
Source: PubMed Central journal article supplement (PMC3460875; doi:10.1371/journal.pone.0046487), 2012-09-28
Supplement: pone.0046487.s003.pdf [file pone.0046487.s003.pdf]

## Le *et al.*, Evaluation of candidate reference genes for normalization of quantitative RT-PCR in soybean tissues under various abiotic stress conditions

**Dataset 1.** Primer locations on respective transcript. Primer sequences are in orange or in red boxes. Primer pairs with positions on two differently colored portions of the sequence are on two different exon or UTRs.

>Glyma17g05270.1

```
AGGGCTTTTTTTCAGTTTTCTCTTCTGAATCCACCGCCACCGCAGCGTGGACGGAATCAGAGTGCAGCCATAGCAGCAGCAGCAGCAGTTATTGAAGTGC
TGCTCTAGTTTGAGGCACAATGAGATTGGAGAAATGCTGGTTTTGCTCTTCAACCGTATACCCCGGACATGGAATCCAGTTTGTTCGTAATGATGCAAAG
ATTTTTCGGTTTTGTAGATCAAAATGCCACAAGAACTTTAAAATGAAGAGAAATCCTCGTAAGGTAAAGTGGACCAAGGCATATCGTCAAGTGCATGGAA
AGGATATGACTCAGGACTCAACCTTTGAGTTTGAAGAGAAAACGAAACAGGCCTGAAAGATATGACAGGAATCTTGCAGGAGAAATGTCCTGAGGCCATTCC
TAAGATTGATAAAATCAGAGTACCAGGGAGGAGAGACACCATAAAGAACAGGATGAAAGGAAAAAAGGAAAAAGCTGCTGAAGGAGGCAGTGAAGGAGTTG
GAGCAGGGCATCAGTTGGTCAAAGCTCCTTCTGTGCTTCAACAGGATCCATCTCTCACATTACCAAAGATCAAAGTCAAGGTTTCCCAACAGCAATCAG
AGGAGAATCATGCCATGGAAGAGTAATTTCTAACAATGCTGCACTTAATTTTTGCCGTTTTAATATTTGTTGCTAAATTAGTTGCCTGTAAGGTCCAGTTT
ACCAGTTTCTTGTGATCATTAAATGTGAATGATGTGTTCTTCAAACATTTCGATGTATTTGTCTCTTAAACTATGGTTCTCTGAGATAGTCAACTATTAT
AAAGGAAATCGGAAAGTTGTTGCTATAGCCT
```

### 60s; 60s Ribosomal protein L30

>Glyma12g02310.1

```
AAAATTTTGGGCAGCATAGATCTGAATGGAGAGCGAGGTGGTGTCCATTGCAGTTTTCTAATGAAAACAACAAAATAGACACCTGTTAAGAAGGAGGACA
ACGATGGTGTGCCGCTATTTACTGCTTTTCACTTCTTTGCTTTTATTCCGAATGGATTGTTAGCAGTTCCCTTCCACCGTCCCAGCATTCCCTTTGGTCAT
CACATTATGAACTGGCCTCTGAAAATATATTGAAGGAATCTGTAAATTACCAAGTCATTTCTCCGAAGGATCTAGCAAAAATCTATTTTATCTGAAGCAGG
CTGGTCAAATTTTCTGTGCAAAGGAAAGAAATTTTATGAGCCTCTGGATCTGGCACTCTTATTTCGTTGGTAGAGAGTTACAATCTTCAGATTTAAGCATG
AACAAACATGCAAACCTCAGCTCTTTTGGACCTGCTCAAGAACTCTTTTCGCCAGATCCAACACTTCTGTGGCATTTCCTATGTTTCTACATCAGAGGATG
TGCTTTTGGAAAACCTGTTGGTTTTAGGATTTGCTGAAGCCTGTGGAGATATGGGAATTGGCAATGTTGCTTTCCATGGATCTTGTCTCCATTGATGATGC
AAATCATGAAGAAAATCACAACCTTTGCACTCAGTTCAAGACTATTTGACCAAGAGGATGGAAGAGAGTCCACAGAGGGAAAACCTGATTTGGTTGTGTTCTGC
AATGAAGGCTCTCAAGCTCTTGAAGATGTTGACAGGACACAATCTGAAGGGGAAGTTTTATCCAATCTTATCAATTCTGTGGAGGAATCTGGTGCAAAAT
ATGCCATTCTTTATGTGTGATGATCCCTCAAGGTCAATCCAGTATCCTTCTTACAGGGATCTGCAAAGGTTTCTAGCAGAAAAGTACAGCCGGGAATGAATC
AACCAATCCACAATTTGTGATGAAGTCTGCCAGATTAATCATCTCTTCTAGAGGGAAATTTAGTGGTAAATTTCTTGTCCATTTTTACAAGTGCAGT
AGCTCGATGACCTGGTATAGTTTTGCTAATAAATTTGATATCGGGCCTTTGCTGCATGATGGGAATTGACACCCCAACAAGATTTGAGACGCCACAAGAG
TAATGATCCATTTGCTGAAGCTAATAAATGTTGTGATGCTCTCGGTCTACTGGATTAATAAATTTACTGCTATATTTTGCGAATGTTACGGAGGCTCTG
ATAAGTGTCTGTAGTTGATGACTTATCTCAGGGACTTGACATATTGAATAATAAATAAATTTGTATCAGTATATAAAAATGAAACTTCAAGCTTAGGTT
TAATTTTATGATCCGCCACCAATTCAGATTATGTAATAATTTGAAGAAATTTTCAAGTATGTTGATTTTTTTAACTGTTTCGCAAATTTGCCCCATTCTGTT
GTGCATAAATTTGCTGATGATGATGCAGTTGCAAGTTTTATTTCTGCTGGGTTTTGAATTGAAGTTTGAAGTTGATTTGAAGAATGTTTAGCAATATGGTAAAAT
TTCGAGTTAAAGTTTGAAGATTGAAGTTAAAGATATTAACAAGTGAAGTTCTAAAAGTAGACGAGTGTGATGAAAGGATTTCAAGGTAAGGGTATAAAT
TGAGAGGAAGTTAATAACAATTACCTTCGCTGCATGCATTGAGTGAAGATGCTGAAATTTTATGCAATTTGTTTACACGTGTTTGTATAGCATATATCAAT
CGTTATGGTTGGAAATCTGAATAGGATATTTATATTCTAATTTTTATTGTTGAAACAGATCGAATAGTGTATGTTCTATACATAAATAAATGGTTACTG
GTTTAAACAAGTT
```

ABC, ATP-binding cassette transporter

ATGGCAGACGCTGAGGATATTCAACCTCTTGTTTGTGACAATGGAACAGGAATGGTTAAGGTACATGATGGATCTTTTGTGTTTGTATTATTTGTTGAAT  
AAACTTACTGTCATACTCTTGTTGGTTTTATGGGAATATCATTTTACATTAATGTTACTTTTTGTGAATTTGAAAAATTAATTGCAACAAATATTTGTAGG  
CTGGTTTTGCTGGAGATGATGCCCCACGTGCTGTGTTTCCCAGCATTGTAGGTCGTCCCTCGTCACACTGGTGTGATGGTTGGCATGGGCCAAAAAGATGC  
ATATGTTGGTGATGAGGCACAGTCTAAGAGGGGTATTTGACTCTCAAGTACCCATTGAACACGGAATTGTGAGCAATTGGGATGATATGGAAAAGATT  
TGGCATCATACTTCTATAATGAGCTTCGTGTTGCCCCAGAAGAGCATCCAGTTCCTTAACTGAGGCCCTCTTAACCCTAAGGCTAATCGTGAGAAGA  
TGACCCAAATCATGTTTGAACCTTTAACACCCCTGCTATGTATGTAGCCATCCAGGCTGTTCTTTCACTTTATGCAAGTGGTTCGTACAACCTGGTAAGCC  
ATTTTTATTTGTTTGAATTAACCTGAGGTTGTATAGTATGAACTTATCTGGGAACTTTGAAATTGAGATAAGCATATGTCAACATCCATGAGAATCTATA  
AAGTCTGTATGTTCAACATTGCATTTTTGGATATTTAAAAATAAACTGAAAATGATTCATTTTATTGTGAATGATTTCACTTGACATATTACTAAATGGA  
GAAAAAACAAATTCTGTGAACTGGGAATTATGATTGTAGAAAACCTGCTGTAAAGATTCTTATATCATGTGATCGACTTTTAAAACTTTATTTATTTGCC  
TTCTCTTTGCAGGTATTGTGTTGGATTCTGGTGATGGTGTGAGCCACACTGTCCCTATCTATGAGGGTTATGCCCTCCCACATGCCATCCTTCGTCTTGA  
TCTGGCTGGTCGTGACCTCACAGATTTCTTGATGAAAATCTTGACTGAGCGTGGTTATTCCTTACCACCTCAGCCGAGCGGGAAATTGTAAGGGATGTG  
AAAGAAAAGCTTTCTTACATTGCCCTTGACTACGAGCAAGAAGTGGAGACAGCCAGGACCAGCTCGTCTGTGGAGAAGAGCTATGAGTTGCCTGATGGGC  
AGGTCATCACCATTGGCGATGAGCGTTTCAGATGTCCAGAGGTTCTGTTCCAACCATCCATGATTGGAATGGAAGCTTCAGGCATTACGAGACAACATA  
CAACTCCATAATGAAGTGCATGTTGATATCAGGAAGGACCTCTATGGTAACATTGTTCTTTTCAGGAGGAACAACCATGTTCCCTGGTATTGCTGACAGA  
ATGAGCAAGGAAATTCGGCATTGGCACCCAGCAGCATGAAGATCAAGGTTGTAGCACCACCGGAGAGAAAATACAGTGTCTGGATCGGTGGTTCTATCT  
TGGCATCTCTTAGCACCTCCAGCAGGTTTGTCTCTTCTTTTATTCTTTTCTGCTTCTTGGAAATGTTATGTTGTTGTGAGATAGTACATTCTTCTAT  
GATAATAATGACACACTTTTGTGTTGAGTGCAGATGTGGATTGCAAAGGCAGAATATGACGAGTCTGGTCCATCAATTGTGCACAGAAAGTGCTTCTAAA  
ACTGTTTGAAGATAGGGTTATTGAAGCGAAAGACTACTATCATCATGATTTGTCTGGAAGCAATGCATTGCAGATTGTAACCCTTTCATTCTAGCTTT

Act11; Actin, reversed primer located after the current annotated version of the transcript but these primers were used in *BMC Mol. Biol.* 2008, 9:59, white background sequences are intron in Glyma database

>Glyma19g32990.1

```
ACACACACAAAATTACACAAAACATAAAAAAAAAAAAAAAAAAACACACACACACTCTCATACACACGTTGTCGCGCACACATTCCCTTCATTCCGCGAGCAAC
AAACAAACATCTTTTACCTTAAACAACAATGGCCGATGCCGAGGATATTCAACCCCTCGTTTGCATAATGGAACCGGAATGGTCAAGGCTGGTTTTGCT
GGAGATGATGCACCGAGGGCTGTGTTCCCTAGCATTGTGGGGCGTCCACGTCACACTGGGGTGATGGTTGGGATGGGGCAGAAGGATGCGTATGTTGGGG
ACGAGGCTCAATCCAAGAGGGGTATTTTACTCTCAAATACCCAATTGAGCATGGAATTGTGAGCAATTGGGACGACATGGAGAAGATCTGGCATCACAC
TTTCTACAACGAGCTTCGTGTGGCTCCTGAGGAACACCCTGTGCTTCTACCGAGGCACCTCTTAATCCTAAGGCTAATCGTGAGAAAAATGACTCAGATC
ATGTTTGTGAGACCTTCAACACCCCTGCTATGTATGTGCTATCCAGGCCGTGCTTTCCCTTTATGCTAGTGGCCGTACAACCTGGTATTGTTCTGGACTCTG
GAGATGGTGTGTCAGTCACACGGTTCCTATCTACGAAAGTTATGCCCTCCACATGCAATCCTGCGTTTGGACCTTGCAGGGCGTGATCTCACTGATGCCCT
CATGAAAAATCTTGACTGAGCGTGGTTACACTTTCACCACATCTGCGGAACGGGAAATTGTGAGGGACATGAAGGAGAAAATGGCCACATTGCTCTGGAT
TATGAGCAGGAGTTGAAAACCTGCCAAGACCAGTTCAGCTGTTGAAAAGAGCTATGAGCTACCTGATGGGCAGGTGATCACGATTGGCGCTGAACGATTCC
GATGCCCTGAAGTTCGTTCAGCCATCCATGATTGGGATGGAATCTCCTGGTATCCATGAGACAACATAAATCTATCATGAAGTGTGATGTCGACAT
TAGGAAGGATCTCTATGGTAAACATTGTCTTGAGTGGTGGTTCCACAATGTTCCCTGGCATTGCTGATAGGATGAGCAAGGAGATTACAGCATTGGCACCA
AGTAGCATGAAAATTAAGTGTGTAGCACCACCAGAGAGGAAGTACAGTGTCTGGATTGGAGGCTCCATCTTGGCTTCCCTCAGCACCTTCCAAACAGATGT
GGATTGCGAAGGCAGAGTATGATGAATCTGGACCATCAATCGTACACAGGAAATGCTTCTAAGTTATAATCATGGAGTGTGAAAGCTGGACAGGGGAAAT
TACTATTTATACAAAATACTACAAAAATACCATCTAGTGGTTGAGGAACTTTCATTTCCCTACTCTTTACCATCCTTTTATCTATCTGTFTTTTGTGTTTC
CTTCTTTGGTATGTTGAGATAAGAGCATGAAGGCTAGCAAGATATGTAAGATTCTTTTTTTTTCTCCCGTCTGTGTGAGAAGAGATGTGAATTGTTA
CCTATTTGGTTTGGTTGAATTAACAAATCTTTTCATGAAGTATTCTGATTAACATAGTGGTACGGTACGTGCTTGATTTA
```

## Act27, Actin

>Glyma12g02790.1

```
CAACCCCAAGCAAAACCCTAATCCCTCTTTCTTCCTCTTCCTCAGTAGTGCATTTTCGATTCTCTTCTCTGCAACTATGCCTAACCCTAAGGTCTTCTT
CGACATGACCATCGGCGGTCAACCTGCCGGCCGCATCGTGATGGAGCTCTACGCCGACGTGACTCCGAGCACCGCCGAGAATTCGCGCGCTCTGCACC
GGCGAGAAGGGCGCCGGGCGGAGCGGCAACCCCCTCCACTACAAAGGCTCTCCTTCCACCGCGTGATCCCGAATTCATGTGCCAGGGCGGCGACTTCA
CCGCCGAAACGGCACCCGGAGGCGAGTCGATCTACGGCGCCAAGTTCGCCGACGAGAATTCGTGAAGAAGCACACTGGTCCCGGCATCCTCTCCATGGC
GAACGCCGGTCCCGGAACCAACGGATCTCAGTTCTTCATCTGCACGACGAAGACGGAGTGGCTCGACGGAAAGCACGTCGTGTTCCGACAGGTGCTCGAG
GGGATGGACGTGCTCAAGGAGATAGAGAAGGTCCGATCCAGCTCCGGCAGGACCGCCAAGCCTGTGCTGTCGCGACTGTGGTCAACTCTCTTAGATAG
ACGACGTTGACCCTAGGCTTTTATCTCTGTGTCGGTGGCTCTGAATGTGTCGTTTCTTTCCGTTGTCGTTTTTGCCTTTTTTTTTCTCTTTCCCATGTCGTT
TAGGGGATTGCGGTGTTATGGATATCATTTCGAAACCCTTCCCTTTGAATCCTTCCCTTCTTAAATATCAGTATCATGTGGTTGTTTCATAGAG
TGAATGGAGTCTGTTATGAGAAACATAAAAAATATGATGAGCTACCTTCAATAAAAAATAGGACCTCTATTATTCGCCTAGTAATTCTCTTTAATCTTC
GATTATTTTTTTTATATACGTTTAGTTGTTTCTGATTATAAATTTGTGAAAATTTGGCGTTTATTAATACCATAGTTTACGATAATTAGAACCTACAAC
AGGAACGTTTATTGGTTTGGTGGATTGATATTTGTGCAGATAATACATACGACTGTGTTATTTTTGATG
```

## CYP2, Cyclophilin

>Glyma19g07240.1

```
ATCACTCTGCTGCCTCGCTCTGTTTCTGTCTCTGTGTTTGC GGCTGAGGATTCCGAACGAGCGACCTTCTTCGTTTCTCGCAAAGTTTAAAGTCATCATGG
GTAAGGAAAAGACTCACATCAACATTGTGTCATTGGACATGTCGACTCTGGGAAGTCAACTACCCTGGTCATTTGATCTACAAGCTTGGAGGTATTGA
CAAGCGTGTGATTGAGAGGTTCCAGAAGGAGGCTGCTGAGATGAACAAGAGGTCATTCAAGTATGCCTGGGTGCTTGACAAGCTCAAGGCTGAGCGCGAA
AGAGGAATTACCATTGATATTGCTTTGTGGAAGTTGAAACCACCAAGTACTACTGCACAGTCATCGATGCCCCCGGACATCGTGACTTTATCAAGAACA
TGATTACTGGTACCTCCCAGGCTGATTGTGCTGTCCCTTATCATTGACTCCACCCTGGTGGTTTTGAAGCTGGTATTTCTAAGGATGGACAGACTCGTGA
GCATGCTCTTCTTGCTTTACCCTTGGTGTGAAGCAGATGATCTGCTGCTGTAACAAGATGGATGCCACTACCCCGAAGTACTCTAAGGCTAGGTATGAT
GAAATTGTGAAGGAAGTCTCTTCCCTACTTGAAGAAGGTTGGTTACAACCCAGACAAGATTCCATTTGTGCCATCTCTGGTTTTCGAGGGTGACAACATGA
TTGAGAGGTCCACCAACCTTGACTGGTACAAGGGACCAACTCTCCCTTGAGGCTCTTGACCAAATCAATGAGCCCAAGAGGCCCTCAGACAAGCCACTCAG
GCTTCCATTGCAGGATGTCTACAAAATTGGTGGTATTGGTACCCTGCCAGTGGGACGTGTTGAGACTGGTGTGCTGAAGCCCGGTATGGTGGTGACTTTT
GGTCCCACTGGGCTGACAACTGAGGTTAAGTCTGTTGAGATGCACCATGAGGCTCTCACAGAGGCTCTTCCAGGTGACAATGTTGGCTTTAATGTGAAGA
ATGTTGCAGTCAAGGATCTCAAGCGTGGTTTTGTTGCATCCAACCTCCAAGGATGACCCTGCCAAGGAAGCTGCCAACTTCCACATCTCAAGTCATTATCAT
GAACCACCCTGGCCAGATTGGAATGGATACGCACCCGGTCTTGATTGCCACACTTCTCACATTGCTGTCAAGTTTTCTGAAATCTTGACCAAGATTGAC
AGGCGATCTGGTAAGGAGCTTGAGAAGGAGCCCAAATTTTTGAAGAATGGTGTGATGCAGGTATGGTTAAGATGATTTCCAACCAAGCCCATGGTGGTTGAAA
CTTTCTCTGAGTATCCTCCCTTGGTCTTTTTGCTGTGAGGGACATGCGTCAAACCTGTGGCTGTGCGGAGTCATCAAGAGTGTGAGAAGAAAAGACCCAC
CGGAGCCAAGGTCACCAAGGCCGCTGCCAAGAAGAAGTGATTGCATTTGGGCAATTTTGCTAGCACATGTGATCATCATCGTGGTTACTCCTTTATAGTA
GTTTTATCCTTGCAGAGTCTTAGGTGTTTTGTTTAAAGTTATATTTTTAAAGTTTTCTGCCGATTTTCATGTAGCCGTAACCTTTCAAACCTAGGTTCTTGATCG
GCGGTGGTCAATTTTCATTGCTGTTTGTGTTTTGATGAGTACTGTTTTTGTGTTTGTGATGGTAAGAAGAGTCTGAGATATTTGCAATTTCAAGCAGCTAT
AGGGTTTTAGTCCATTTCTTTGCTGCTGAGGGATGTTTTAAAGTTGCATTTAATTTATAACGAAGTTTTATAAACTGTTTATGGTTTTAAAGGCTATTATT
CTTT
```

## ELF1a; Eukaryotic elongation factor 1 alpha

>Glyma02g44460.1

```
GTGACTGTGCATGCTATAAATATCAATTATTGAGCATTGAAGGAGTCTCTCTCTTTTTCACTCACTCACTCTGCACTCACCCTGCCACACTTCAATCGC
ACTAATGGCTGTCACCTTCTCAGATCTACACACCGAAGAGGGCATCAAATCCCTCGATCAATTCCTTTCTGGGAAAACCTATATTTCTGGGGATCAGTTG
ACAAAGGATGATATTAAGTGTATGCAGCTGTTGTTGAAAAGCCAGGGGACCTTTTCCATAATGCTGCCAAGTGGTACGATGCTGTCTCTTCTCAACTTG
CTCCAAGCTTTCTGGCCACGCTCAAGGGGTAAGATTTCAGTGGCGCTGCTGCTCCAGCTGAAGCTGCACCTGCCAAAGCGGCTGCCACTGCTGAAGAAGA
TGATGATGATCTTGATCTCTTTGGTGTGAGACAGAGGAAGATAAGAAGGCAGCAGAGGAAAAGGGAGGCTGCTAAAAAGCCTGCCAAGAAAAAAGAGAGT
GGCAAGTCTTCTGTCTTCTCGATGTTAAGCCTTGGGATGATGAGACCGACATGAAGAAGCTGGAAGAGACTGTCCGAGTATTGAGATGCCTGGTTTTAT
TGTGGGGAGCATCAAACCTGGTTCCTGTGGGATATGGGATCAAGAAGTTGCAGATCATGATGACTATTGTTGATGACCTTGATCCGTGGACACCCTTGT
TGAGGAACGCTTGACAGTTGAGCCATGCAACGAGTATATCCAGAGCTGTGACATTGTTGCATTTCAACAAAATTTAAGTTTTCTGTTTTATTTTGATTTTA
GCCATTTTCAAGCGGCTGATCAGTCTGTTACTCTTCCCTTTCATTGTTTCATGTTTGGTCTCTTTCAATAGTGGTTTTGTTGCAAAAATTTGTGAGAAGTAAA
AGCAATATATTAGGTTGTGTTTGGTTTTATATTTTTATTTTCTGTTTTTATTTTATTTGTTTTTCAGTTTTTGGTTAATTTGGGAAAATATTTTTCATTGAAAA
TGAAAATAGAAATCCAACAAAATACATTTTCATTATCATTTTTTATTTTATATAAAAATGAAAATAGAAAATAATCAAATCAAACACCCCTTAAATATCA
TGTTATGGTGTATCTTTGAATATTATTTCTTGAATTAGATTTATGGGATTAAGATAACTGAACGATGTGCTTCAATT
```

## ELF1b, Eukaryotic elongation factor 1 beta

>Glyma12g05510.1

```
GTTTTGTTGTTTGGTGTATTTTATTTTTTTAATCCGTAAAAATAAAAAAGAAATACAACATTTACCCACCCTTGTGTTATGTGAGTGC GGCAATAGT
GGAATAGCGGTAGAGTGTGCGATCGAGAAAGCAGAAAGCAGAAAGATGGGGTTGGAATCGGTGGGAGATTTAGCGATTAACGTGATTCTGAAAAAATTAG
GAGCCCAAGACATTGCGAGAGTGGCGTGTGTGAGCAAAAGGTTCA GTTCTTCCGCTTCCGATGACACTCTTTGGATCAATCTCTGCTTCAATGAACTCGC
TTTGACACAACCCCTCGATCATCTCGGAAACCCCTCTCTCTTCCCTCAAGGAATGCTATCTAGCATGGAGAGGAGCTTTTGTATGTACCCTTGGTCTCTT
GTTAAGCGTGTAAAAAGGTGCTGGGATAGAATAAAAAACCTGGTTGACCAATAATTTTCTTGAAGCGGAGGCCACTCTTTGTAAAGGTGCAACTGAAGCTG
ACATTCAGGAGTTGGAGAATGTATTAAGGTGAAAATTGCCTCTTCTTACAAGGATCCTTTATCGCTTTCACAATGGGCAAGAAATTTGCAAAGGCAGATCC
AGAAACTAGTACATTTGGCAGATCTTTGGGTCTAATTGGTGGCTACTCCTTCTATGGTCATTTGGTGAATGTTTATCTATTACCTATATGTCAGATAATC
CTAGAAACTCAGCAAACCTAGGCGTCGCTTGAGCTTTTTAAGAAGATCAAAGTATGTTCTTGTGGCTGCTTCATCCACATACAGTAGAAAAGTTGTTTTTCC
TCAACTGTACCAATGGTCAACTATATGTGCGGACCAGGTCTCCTCTTACCGAAAAGAGACATAATCCCTTGTGTACCTCATGACCTGATTAGTTTACATCA
GGAATTGAATAGTTTACAGCAACAAGATGCCATGCTACTGTGGTTAGAAGAACATGGTGC CGTTTAGAACACGGCTTTATCAAACCTCATGATGAAGGA
AATGGCAAAGCATTAACTTTTTCCAGAAGAACCCCATATTTGTTCAACGGCTGTACTAATGGTGTGAAGTTTCGCGCTTCTGCACTGGTTATCCCTG
AGTTGATGGATCTTCAAGATGACCTTGGAGAGTACTTATTTGCTTATTCAATCCGCTTGTCCCTTGAACCTCAAGGATGCATTATTAATGGAATGTCCTT
CAGCTCTTGCCAGCTCCATTGGAGGCCTGGATCATCCGTGCTAATGATATTGTTATATCTGATGTCAGTGGAAAAGCTGTTATAGGACAGTTTCCACTT
TTGCGTCCGGGTGCTCAAGAAATTTGTTTATCAGAGTTGCACGCCTCTACCAACACCATCAGGTTCTATTGAAGGTTCTTTTACATTTATACCCGGCAGAT
TGGCAGACCCAAAAAGGAGACCCTTTTCTAGCTACAGTGGCTCGTTTTCCCGCTCCAGCTGCCAGACTATATATTCTGATTTTGGATTCTGGATGGGATTGAA
GTATCTCTAATGGCAATTGCAGCTCTCAGATATTGTTGGGTGTATTATGTCCCTTTCGGGAGAGGTTTTTAAGTTGACCTGCACAAATTTCCCTATCTA
TAAGAGAAGCAAAGTATGTACAATATTTGATCTCTATCATAAGAGAAGCAAAGTAGATAACAATATTTGTTAGGGGTGTTCA TGTTTGGATTAGGTTGGAT
TTTTGTTAAAAAATCATCCAAATCAAACCTAAAAAAGCTGTGATTTGGTTCGATTCAGTTTTCATTTAAAAATAAAATTCAAATCAGACCAAGTTAATAT
ATATTGCACTTTAGTTCAA
```

## Fbox. F-box protein family

>Glyma13q17830

```
ATTCATAGCTATTTCGCAGTTCCCAAAATCATTTTAATCCTAATTCTGCACCTTCTTGATCATTTCGATTTTCTCCTCAAGGTTTCGTCTCTGTTTCATCTCT
TTTCATCATCGCAGCCTAATTAGCCTTAGTTTATTGATTTAGCTTTGGTCTTTACCATGGTTACATTTTTACGTTTCTATCTTTTCGATTTGTGATTTTT
TACGTTAATATGTGTATACCGTTTTGTCGTTGTTGAATCCGAAACTTTCCATTTCGACTTTCTGATTCGGTATCTCGTTTGTACATGCAAAATCTTTCC
CGATTTTTAATCTGGCTATCTGATTTGATTTGATTTTGGAGAAATAGGGTTCGTGGTTTGAATTTGATTCTGTGATTCGCTTGTATATGTAATAATTTCC
CGGTTCCCTAATTTAGGGTCTGCGATTTATTTCTTTTATCACTTTTGGGAATCAGGGATCGTGGTCTGACTTATTGTGCATTATTTAGTTGTATGCTG
CAAAATCTTTCCCTATTTTTAATTAGGGTTAGGGTTTGCATTTTGGGAATTATGGTTTGTGGTTTATTGATTATGCAATTCGGGTTTGC
TTTCTTTCCGGTTTTTAATCAGAGTTCCTGACTTTGATGTTCTTTTTTGTGATTGAACAGATGCAGATATTCGTAAAAACTTTGACCGGCAAGACCATC
ACCCTTGAGGTGGAATCCTCCGACACCATTGACAACGTAAAAGCTAAGATTCAAGACAAGGAAGGGATCCCACCTGACCAGCAGAGACTTATCTTTGCGG
GTAAACAACCTTGAGGATGGTGCACCCCTTGCCGATTACAACATCCAAAAGGAATCAACCCTCCATCTCGTGCTTCGCCTCAGGGGTGGCATGCAAAATCTT
TGTCAAGACTTTGACCGGGAAGACCATCACCCCTTGAGGTGGAATCCTCGGACACCATTGATAATGTTAAGGCCAAGATCCAGGACAAAGAGGGCATCCCC
CCAGATCAGCAGAGGCTGATTTTTGCCGGTAAACAACCTTGAGGATGGAAGAACCCTTGTGATTACAACATTGAGAAGGAATCCACCCTTCACTTGGTGC
TTCGTTTGGAGAGGTGGTATGCAGATTTTCTGTTAAAACCTTTGACCGGAAAGACCATAACCTTGGAGGTGGAGAGTTCAGATAACCATAGACAATGTGAAAGC
TAAGATTGAGGACAAGGAAGGTATCCACCAGACCAACAGAGGCTTATCTTTGCCGGGAAACAGCTTGAAGATGGAAGAACCCTTGTGACTATAACATC
CAGAAGGAATCTACCCTGCACTTGGTGTGCGGCTTCGTGGTGGCATGCAAAATCTTTGTTAAGACTTTGACTGGAAAAACCATAACTTTGGAGGTTGAAA
GTTCTGATACCATTGATAATGTGAAGGCAAAGATTGAGGACAAGGAGGGCATTCCACCTGATCAGCAGAGGCTTATTTTTGCTGGGAAGCAACTGGAAGA
TGGTTCGTACCTTGGCAGATTACAATATTGAGAAGGAATCCACCTTGCATCTCGTCCCTTCGCCTTCGCGGTGGTTTTTAAGCGTGTTTTTTTTTCAAGTGTT
CTTGTTTTAAGCGTGTCTTTTTTCAAGTGTTCTTGTATGTATGTTCAATTTCTCCCTTGAACCTGTTTGTGCTGTTCTGGTTTAGGTGCTGC
TTTTTATGTTTTAATATGATGTATTGAGCTCGTTTCGCCAAAAGAATTAATATCAATATCGTATCATAGTTAAATTCATATTTTCGT
```

SUBI2, Ubiquitin

>Glyma05g29000.1

AGGAGTATGTTAAGACTTGAGAGTGGAGAGAGAGTGGAGAGTGGTGGATAGAGAGAGACGCTTCGCAAATCTCAATCGAATCTCAGAAAAATGAGA  
 GAAATCATCAGCATTACATAGGTCAGGCCGGGATCCAGGTCGGAAACTCCTGCTGGGAACTCTACTGCCTCGAACATGGCATCCAGCCCAGCGCATGA  
 TGCCTTCTGACTCCACCTTCGGTGTAGC**CACGACGCCTTCAACACCTT**TTTCAGCGAAACCGGATCTGGCAAGCACGTCCCCCGTGTCTTCGTCTGA  
 CCTCGAACCCACCGTCATCGACGAGGTCCGCTGCGGCACCTACCGTCAACTCTTCCACCCCGAACAACCTCATCTCCGGCAAGGAAGACGCCGCCAACAAAC  
 TTCGCCCCGCGCCACTACACCGTTGGCAAAGAGATCGTAGATCTGTGCTTGGATCGCGTCCGCAAGCTCGCCGACAACCTGCACCCGGCTACAAGGCTTCC  
 TCGTCTTCAACGCCGTTCGGCGGTGGCACCAGGTTCCGGTCTCGGATCTCTTACTCGAGCGTCTCTCCGTTCGATTACGGCAAAAAATCCAAATTAGGGTT  
 CACCATTTACCCTTCCCCACAGGTTTTCAACCGCAGTCGTTGAACCTTACAACAGCGTCTCTCCACCCACTCCCTCCTGGAACACACCCGACGTGGCGGT  
 CTCTTGGACAACGAAGCCATCTACGACATCTGCAGGAGATCCCTCGACATCGAGAGACCAACCTACACCAACCTCAACAGGCTCATTTCCAGATCATTT  
 CGTCCCTCACCATTTCCTTGGAGTTCGATGGTGCATCAATGTGGATATCACTGAGTTCAGACCAACCTTGTGCCCTACCCTAGGATCCACTTCATGCT  
 TTCGTCTATGCTCCGTTATCTCTGCCGCAAGGCTACCACGAGCAGTTGTGGTGGCAGATCACCATGCCGTGTTTCAGCCCAGCATGATG  
 GCCAAGTGTGATCCAAGGCACGGCAAGTACATGGCTTGTGCTTGTATGTACCGTGGTGTGTTGTCCCTAAGGATGTCAATGCTGCTGTTGCCACCATCA  
 AGACTAAGAGGACTGTTCAAGTTGTTGATTGGTGTCCAACCTGGATTCAAGTGTGGTATCAACTACCAGCCACCTTCTGTTGTTCCCTGGTGGTACCTTGC  
 TAAGGTTTCAGCGTGTGTATGCATGATCAGCAACAACCCGAGTTGTGAGGTGTTCTCTCGCATTGACCACAAGTTTGTATCTGATGATGCCAAGAGG  
 GCTTTTGTTCACTGGTATGTTGGTGGAGGATGGAAGAAGGGGAGTTTTCTGAGGCTCGTGAGGACCTTGTGCTCTTGAAGAAGGACTATGAGGAGGTTG  
 GAGCTGAAGGAGCGGAAGATGATGAGGAAGGAGAGGACTATTGATAATCGAAGGCTTTTTTTTGTATCAATGTAATTGTTTCCGAGTTAAAAGGGTATA  
 TGCTTCGTTACATTACCCTGAACCATTATTGTTTCGTTCTTTTTTGTCTCTGCTGCTGTGTGATATAGTTCTCCATTATTCAAAGTGTGAAGTGTCA  
 ACATTATGCTTCTATTTGGTGGTTTAGGACCTGTTGTTTGCATCCTCAGTCATGTATTGAGAATTGTCCATGTCAAAGTTGATTTCTTATGTTTATCT  
 CGCAAATTTTACCAGATTCCCGTTTTGATTATCTCTTTATGAACCGTGAAAAACGTACCCTCGTATGTTTTTTGCAATTCGCTTCATTCTGG

TUBa,  
Tubulin

>Glyma20g27280.1

GCTCACGCACCGTGAACCAACCCTGGTTACAGATAAACCACAGCACAGCTACCCCATACATCTCCCTATAAAAACCAATCCCAAATCCTACGAACGCTCCTC  
 ACTTCCAGATTTCAAAGAAGGCGTCTTCATAAACGCCTTTCTTCTCCGTTTCCGTTT**CCTCGTTCGAATTCGCTTTTTG**ATCTGCGAAAATGAGAGAGTG  
 CATCTCGATCCACATTGGTCAAGGCTGGTATCCAGGTCGGAAATGCTTGGTGGGAGCTCTACTGCCTCGAGCACGGCATCGGGCCCGATGGGCA**ATGCCA**  
**AGTGACAAGACAGTTG**CGCGTGGTGTATGATGCTTTCAATACTTTCTTTCAGCGAGACTGGTGTGGAAAGCACGTGCCACGTGCAGTGTGTTGTAGATCTTG  
 AGCCCACTGTTATTGATGAGGTGAGAACCAGGAACTTACCAGCCAGCTTTCCACCCAGAGCAGCTCATCAGCGGCAAAGAAGATGCCGCCAACAACTTTGC  
 CCGTGGCCATTATACCATTGGGAAAGAGATTGTTGATCTGTGCTTGGACCGCATCAGAAAGCTTGTGACAATTGCACTGGACTCCAAGGGTTTTTGGTCT  
 TTCAATGCCGTTGGTGGAGGAACTGGTTCTGGACTTGGTTCCCTTCTCTTGGAGCGTCTCTCCGTTGATTATGGCAAGAAATCAAAGCTTGGTTTTACAG  
 TCTACCCCTCTCCTCAGGTGTCCACCTCTGTTGTTGAGCCATAACAAGTGTCTCTCCACCCATTCTCTCTTGGAGCACACCGATGTTGCTGTCTCTT  
 GGACAATGAAGCCATTTATGACATCTGCAGACGCTCTCTCGACATTGAGCGTCCCACCTACACCAACCTCAACCGCCTTGTCTCAGGTGATTTATCT  
 TTGACTGCTTCTTGGAGTTTTGATGGTGCCTGAATGTGGATGTGACTGAATTCAGACCAACTTGGTCCCATACCCTAGAATCCATTTATGCTTTCTCT  
 CCTATGCACCAGTTATCTCTGCTGAGAAGGCTACCATGAACAGCTCTCAGTGGCAGAAATTACCAACAGTGTCTTTGAGCCATCGTCCATGATGGCCAA  
 GTGTGATCCTCGTACGGAAAGTACATGGCGTGTTCCTGATGTACCGTGGTGTGTTGTGCCAAAGATGTAACGCTGCTGTTGCCACCATCAAGACC  
 AAGAGGACCATTCAAGTTGTGGATTGGTGCCTACTGGTTTCAAGTGTGGTATTAACCTACCAGCCACCTACCCTGTTTCTGGAGGCGACCTTGCCAAGG  
 TGCAGAGGGCAGTTTGCATGATTTCAAACCTCACCAGTGTGGCTGAAGTGTGTTGGCCGATTGATCACAAGTTTGTATCTCATGTATGCCAAGCGTGCTTT  
 TGTCCACTGGTACGTGGGTGAGGGTATGGAAGAAGGTGAATTTCTGAAGCCCGTGAGGACCTTGCAGCCCTTGAAGAAGGATTATGAAGAAGTGGGTGCT  
 GAGTCTGGTGGGGCCAGGAAGAGGATGAAGACTACTAGAATCTACTTCAGATTCTTGTCTTGTGGTCTGTTTTCTGTTGTGTTTGTATGTTTCAGATGTG  
 TACCAGTACCAGTGTGGTTTTAATTTGGATGCATTGCTTTTATGCTTCCGTGCTCCTGTTACGTACCTAAACTGAATGGCAATATTGAACTATGTTGTTT  
 TAGTTGTGTAATTTGTGTTAATTGACTCATTACGGGCACGGGAGTGCGGCAATTGGTTAAGCAGCCTGATTTTGTAAAGGCAAGTGGGTTATAGCAGCAGGG  
 TGGATTCAATAGTGGTACTTCTATGGAATTTAACTGGGCCTAAAATTTGACAAAAATAAAACTCTTAAATGGTAGAGGGTTATAAACCTACAATAGAAA  
 AATCTGTTGATTTTGGAGTTTTAGTGATATTTGTTGAGGAAAATTTCTAAAACCTTGTCTTAAATAGACCAGCGTAGCTATTTTAAATAAAATTATAA  
 TACACTTTAGGGTTGCACAATTATAATACATAGTTATTGCAGAT

TUBb,  
Tubulin
